# Supplementary material for: ISOWN: accurate somatic mutation identification in the absence of normal tissue controls
Source: Genome Med. 2017 Jun 29;9:59. doi: 10.1186/s13073-017-0446-9 (PMC5490163; doi:10.1186/s13073-017-0446-9)
Supplement: Supplementary file 1 — Supplemental material including supplementary methods and supplementary results as well as Tables S1 and S3– S8. Table S1: Results from 10-fold cross-validation. Table S3: Comparison of the somatic mutation ratio in the whole dataset vs in the subset of variants that were catalogued by dbSNP/common_all but not by COSMIC. Table S4: Number of germline variants with high CNT in different cancer sets. Table S5: Number of variants with “mixed” labels in different cancer sets. Table S6: Uneven distribution of the somatic mutations and germline polymorphisms in Mutation Assessor categories. Table S7: Uneven distribution of the somatic mutations and germline polymorphisms in PolyPhen-2 categories. (PDF 208 kb) [file 13073_2017_446_MOESM1_ESM.pdf]

## Additional File 1 - Supplemental material

ISOWN: accurate somatic mutation identification in the absence of normal tissue controls

### SUPPLEMENTAL METHODS:

**List of tested learning algorithms:** We have tested the performance of different learning algorithms that represent major classification methods:

(i) *The rule-based method* generate classification models using a collection of "if ... then ..." rules. It is also known as *Separate-And-Conquer* method. This method is generating a rule that covers a subset of the training examples and then removing all examples covered by the rule from the training set. This process is repeated iteratively until there are no examples left to cover. The algorithms are usually computationally inexpensive, are capable of incorporating categorical and continuous variables and the developed models are usually easy to interpret. RIPPER, a deterministic rule-based classifier algorithm, was evaluated in the current study. RIPPER states for "Repeated Incremental Pruning to Produce Error Reduction" and is named JRIP (i.e. Java implementation of RIPPER) in WEKA. JRip builds a ruleset by repeatedly adding rules to an empty ruleset until all positive examples are covered (1). After the building process, a ruleset is optimized to reduce its size and improve its fit to the training data. It helps to prevent overfitting.

(ii) *Decision tree algorithm* is a very popular and practical approach for pattern classification. Decision tree is constructed generally in a greedy, top down recursive manner. Three algorithms that belong to this approach were tested:

a. J48 is the Weka implementation of C4.5 algorithm, the most popular tree classifier (2). At each node of the tree, C4.5 chooses the attribute of the data that most effectively splits attribute set into subsets enriched in one class or the other. The splitting criterion is the normalized information gain. The attribute with the highest normalized information gain is chosen to make the decision. The C4.5 algorithm then recurs on the smaller sub-lists. No changes to the default parameters were made.

b. Random Forest (3) is a well-known meta-learner that generates many individual trees. Each tree depends on the values of a random vector independently sampled and with the same distribution for all trees in the forest. For forests, the generalization error converges to a limit as the number of trees in the forest becomes larger. The main advantages are related to its robustness to noise, and fast computation

## 2 | **Additional File 1 - Supplemental Materials**

ISOWN: accurate somatic mutation identification in the absence of normal tissue controls

over large datasets. Number of trees was set to 100 for all datasets and number of features was set to 3 (calculated as a square root of the whole number of attributes).

c. A Least Absolute Deviation (LADTree) is one of the decision tree machine learning algorithm. The LADTree algorithm applies logistic boosting algorithm in order to induce an alternating decision tree. It uses least absolute deviation (LAD) to find the error criterion to obtain regression trees (4). Default parameters were used in all experiments.

(iii) We tested two *function-based algorithms*: Support Vector Machine (called SMO in WEKA and denoted SVM in this study) and Logistic Regression. SVM learner used a linear kernel that showed a better performance in comparison to RBF kernel. Complexity parameter (C) for SVM and ringe (R) parameter for Logistic regression were optimized for each cancer set separately using WEKA meta-classifier CVPParameterSelection. SVM is a classifier that converts data objects into a multi-dimensional vector and defines a separating hyperplane among the objects belonging to different classes.

(iv) *Naïve Bayes Classifier (NBC)* is known as a simple probabilistic classifier and assumes the independence of features given a class. NBC was tested with and without Kernel Density Estimation (KDE) and with and without supervised discretization (SD) to process numeric attributes. KDE might improve the performance if the normality assumption of numeric value distribution is grossly incorrect. Handling numeric attributes using SD might also influence the final output from the classifier. Validation showed that NBC with SD set to 'true' and KDE set to 'false' shows the most accurate results.

(v) In *distance-based methods* (also called instance-based methods *or* lazy learning) a distance function is used to determine which member of the training set is closest to an unknown test instance. We tested IB1 (Basic nearest-neighbor instance-based learner) and IBk (k-nearest-neighbors classifier), but due to slowness and very poor performance these classifiers were excluded from further validation.

**FFPE sample sequencing and processing:** 1491 ER+ early breast cancer FFPE samples from the Tamoxifen versus exemestane adjuvant multitcentre (TEAM) clinical trial were sequenced using a breast cancer specific gene panel sized ~0.55 Mbps using AmpliSeq technology. Raw reads were aligned

## **Additional File 1 - Supplemental material**

ISOWN: accurate somatic mutation identification in the absence of normal tissue controls

against hg19 using novoalign (version 2.07.14) and only reads that aligned uniquely (mapping qualities > 30) were kept for downstream analysis. Aligned reads were then subjected to local realignment and base quality recalibration prior to calling variant calls with GATK's UnifiedGenotyper (version 1.3.16) with downsampling disabled. Low confidence variants were removed with the following filters: (a) read depth >= 50; (b) maximum number of variants per 10 bp window = 3; (c) strand bias > -10; and (d) variant quality >= 50.

## 4 | **Additional File 1 - Supplemental Materials**

ISOWN: accurate somatic mutation identification in the absence of normal tissue controls

62

### 63 | **SUPPLEMENTAL RESULTS:**

64 | **Justification of the variant pre-labeling stage:** The variants that are catalogued by dbSNP/common\_all  
65 | but not by COSMIC are significantly depleted from somatic mutations. The percent of somatic variants in  
66 | this subset is consistent ranging from 0.01 to 0.02% (Additional file 1: suppl. Table 3). That's a reason we  
67 | named this subset as a "gold standard negative set". Rather than going through the classifier, each  
68 | variant of this type was *a priori* labeled as a germline. For example, in COAD only roughly one mutation  
69 | per sample (245 somatic mutations across 215 samples) that are catalogued by dbSNP/common\_all but  
70 | not by COSMIC will classified as germline polymorphisms. These misclassified somatic variants are  
71 | slightly increasing the final false negative rate, but this assumption significantly improves the overall  
72 | performance of the classifier, first because 1,374,557 variants are classified correctly; secondly, because  
73 | removing this huge pile of the germlines from the testing set balances positive and negative instances  
74 | and again improving the final performance of the classifier.

75 | A majority of the variants catalogued by COSMIC were identified only in one sample (CNT=1). But in a  
76 | very few special cases, CNT might go up to several hundreds or higher (like for the variant  
77 | chr3,178952085A>G in PIK3CA gene CNT=1,635 or for chr7,140453136A>T variant in BRAF  
78 | CNT=19,966). They are well known cancer-associated and, in many cases, also cancer-causing variants.  
79 | Vast majority of those in the investigated datasets are somatic and only in the very rare cases could be  
80 | germline: out of ~9,000,000 germline polymorphisms from ~1,000 samples analyzed in this study only 7  
81 | have CNT >=100 (Additional file 1: suppl. Table 4). In counterweight to "gold standard negative set" these  
82 | variants were called "gold standard positive set". All variants with CNT>=100 were labeled as somatic  
83 | and bypassed the classifier (Figure 1). This filtering step helped us to accomplish a number of tasks: (1)  
84 | we are sure that the classifier is not missing the most valuable for further analysis variants; (2) classifier is  
85 | not confused by extreme outliers in CNT feature; (3) final true positive rate (recall) might be improved.

86 | **Variants are monolabeled across all tumor samples:** We made an assumption that variants that are  
87 | sharing the same genomic position and allelic set is either somatic or germline across all tumour samples  
88 | within a particular cancer data set. To justify this assumption we calculated the number of unique variants

## **Additional File 1 - Supplemental material**

ISOWN: accurate somatic mutation identification in the absence of normal tissue controls

that have been labeled as both somatic and germline in different samples using conventional paired sequencing, or, as we call them, “mixed variants”. Additional file 1: Suppl. Table 5 shows that all datasets have a comparable rate of mixed labeled variants ranging 0.005-0.70% of all unique variants in the set. Interesting that PAAD set contain only five variants with mixed labels.

Number of mixed labels doesn’t correlate either with number of samples in the dataset nor with a ratio of somatic nor with somatic mutational load and might represent an internal property of the set.

A significant portion of all mixed labeled variants are called only in two samples (in one – somatic, and in another – germline) [Additional file 1: suppl. table 5]. As the sample frequency rate for these mutations is low, the effect of the simplifying assumption won’t have large impact of the final classification output. Another telling observation is that a significant portion of all variants with mixed labels were called by the TCGA projects in at least 50 samples and in all but one sample this variant was labeled as germline. This might indicate a misclassification error by the paired mutation caller (Additional file 1: suppl. Table 5).

‘Mixed label’ variants were excluded from training and testing sets.

105

106 **REFERENCES**

107 1. Cohen WW. Fast effective rule induction. *Proceedings of the twelfth international conference on*  
108 *machine learning* 1995; 115-123.

109 2. Quinlan RC. 4.5: Programs for machine learning Morgan Kaufmann Publishers Inc. *San Francisco,*  
110 *USA* 1993.

111 3. Breiman L. Random Forests. Statistics Department, University of California. *Machine learning* 2001.

112 4. Holmes G, B. Pfahringer, R. Kirkby, E. Frank, and M. Hall. Multiclass alternating decision trees.  
113 *European Conference on Machine Learning* 2002; 161-172.

114

115

## Additional File 1 - Supplemental material

ISOWN: accurate somatic mutation identification in the absence of normal tissue controls

### SUPPLEMENTARY TABLE

**Suppl. Table 1.** Performance measures from 10-fold cross-validation using seven classification algorithms performed on randomly generated 1000 training sets each containing 700 somatic mutations and 700 germline polymorphisms from six different cancer types.

**Suppl. Table 2:** Performance measures calculated based on held-out independent sample set across six cancer datasets. NBC and LADTree algorithms were chosen in the 10-fold cross-validation and used here. Classifiers were trained based on the gradually increasing number of samples (Samples In Training Set). Number of positive instances collected from the indicated number of randomly selected samples is shown in Column B. Provided as an excel file (additional file 3).

**Suppl. Table 3.** Comparison of the somatic mutation ratio in the whole dataset vs in the subset of variants that were catalogued by dbSNP/common\_all but not by COSMIC. The latest contains vanishingly small number of somatic mutations.

**Suppl. Table 4.** Number of germline variants with high CNT in different cancer sets.

**Suppl. Table 5.** Number of variants with “mixed” labels in different cancer sets as well as their characteristics. \*Only non-silent SNVs in coding regions.

**Suppl. Table 6.** Distribution of the collapsed (unique) somatic mutations and germline polymorphisms in different categories for functional impacts based on Mutation Assessor (MA) annotations across six cancer datasets. Only variants with known MA annotations were taken into account. Germlines are prone to be more neutral, whereas somatic mutations have more high and medium impacts on the protein functionality. Mutation Assessor serves as an independent feature in ISOWN. The p-value was estimated based on 2-sample test for equality of proportions.

**Suppl. Table 7.** Distribution of the collapsed (unique) somatic mutations and germline polymorphisms in three categories of PolyPhen-2 across six cancer datasets. Only variants with known annotations were taken into account. Germlines are significantly enriched in ‘benign’ type, and somatic in both ‘probably’ and ‘possibly damaging’. PolyPhen-2 also serves as an independent feature in ISOWN.

## Additional File 1 - Supplemental Materials

ISOWN: accurate somatic mutation identification in the absence of normal tissue controls

### 144 SUPPL. TABLE 1

145 Results from 10-fold cross-validation using seven classification algorithms that was performed on  
 146 randomly generated 1000 training sets each containing 700 somatic mutations and 700 germline  
 147 polymorphisms from six different cancer types.

| Cancer | Classifier          | F1-measure | Recall | FPR   | Precision | AUC    |
|--------|---------------------|------------|--------|-------|-----------|--------|
| UCEC   | JRip                | 97.94%     | 98.05% | 2.17% | 97.84%    | 98.69% |
| COAD   | JRip                | 96.34%     | 96.71% | 4.06% | 95.98%    | 97.58% |
| KIRC   | JRip                | 97.47%     | 97.40% | 2.45% | 97.55%    | 98.23% |
| BRCA   | JRip                | 96.69%     | 97.24% | 3.90% | 96.15%    | 97.00% |
| ESO    | JRip                | 94.04%     | 95.60% | 7.73% | 92.54%    | 95.29% |
| PAAD   | JRip                | 96.04%     | 96.51% | 4.47% | 95.58%    | 97.05% |
| UCEC   | Random Forest       | 98.20%     | 98.16% | 1.77% | 98.23%    | 99.84% |
| COAD   | Random Forest       | 96.46%     | 96.94% | 4.06% | 95.99%    | 99.32% |
| KIRC   | Random Forest       | 97.50%     | 97.26% | 2.25% | 97.74%    | 99.66% |
| BRCA   | Random Forest       | 96.45%     | 96.22% | 3.30% | 96.69%    | 99.06% |
| ESO    | Random Forest       | 93.07%     | 94.08% | 8.08% | 92.09%    | 97.25% |
| PAAD   | Random Forest       | 96.16%     | 96.79% | 4.52% | 95.54%    | 99.11% |
| UCEC   | J48                 | 97.80%     | 98.06% | 2.47% | 97.55%    | 98.47% |
| COAD   | J48                 | 96.16%     | 96.55% | 4.25% | 95.79%    | 97.49% |
| KIRC   | J48                 | 97.42%     | 97.25% | 2.39% | 97.60%    | 98.25% |
| BRCA   | J48                 | 96.57%     | 97.34% | 4.25% | 95.83%    | 96.77% |
| ESO    | J48                 | 93.77%     | 95.29% | 7.96% | 92.32%    | 95.56% |
| PAAD   | J48                 | 95.90%     | 96.57% | 4.83% | 95.24%    | 96.28% |
| UCEC   | Logistic Regression | 97.48%     | 97.40% | 2.45% | 97.55%    | 99.42% |
| COAD   | Logistic Regression | 95.17%     | 95.27% | 4.93% | 95.08%    | 98.65% |
| KIRC   | Logistic Regression | 95.94%     | 95.63% | 3.72% | 96.25%    | 99.02% |
| BRCA   | Logistic Regression | 95.62%     | 95.25% | 3.99% | 95.98%    | 98.47% |
| ESO    | Logistic Regression | 92.11%     | 93.05% | 9.00% | 91.19%    | 95.85% |
| PAAD   | Logistic Regression | 95.36%     | 95.84% | 5.16% | 94.89%    | 98.46% |
| UCEC   | LADTree             | 98.29%     | 98.23% | 1.64% | 98.36%    | 99.84% |
| COAD   | LADTree             | 96.59%     | 96.84% | 3.68% | 96.34%    | 99.40% |
| KIRC   | LADTree             | 97.71%     | 97.61% | 2.19% | 97.81%    | 99.69% |
| BRCA   | LADTree             | 96.81%     | 97.03% | 3.42% | 96.60%    | 99.10% |
| ESO    | LADTree             | 94.53%     | 95.45% | 6.51% | 93.62%    | 97.88% |
| PAAD   | LADTree             | 96.38%     | 96.92% | 4.19% | 95.86%    | 99.05% |
| UCEC   | Naive Bayes         | 98.29%     | 97.93% | 1.34% | 98.65%    | 99.81% |
| COAD   | Naive Bayes         | 96.11%     | 95.06% | 2.75% | 97.19%    | 99.39% |
| KIRC   | Naive Bayes         | 96.58%     | 95.02% | 1.74% | 98.20%    | 99.56% |

## Additional File 1 - Supplemental material

ISOWN: accurate somatic mutation identification in the absence of normal tissue controls

|      |             |        |        |        |        |        |
|------|-------------|--------|--------|--------|--------|--------|
| BRCA | Naive Bayes | 96.40% | 95.84% | 3.00%  | 96.96% | 99.01% |
| ESO  | Naive Bayes | 89.47% | 90.45% | 11.75% | 88.51% | 95.69% |
| PAAD | Naive Bayes | 95.13% | 94.32% | 3.97%  | 95.97% | 98.93% |
| UCEC | SVM         | 97.41% | 97.26% | 2.43%  | 97.57% | 97.42% |
| COAD | SVM         | 94.06% | 94.24% | 6.12%  | 93.90% | 94.06% |
| KIRC | SVM         | 95.51% | 94.96% | 3.88%  | 96.07% | 95.54% |
| BRCA | SVM         | 94.69% | 92.81% | 3.23%  | 96.64% | 94.79% |
| ESO  | SVM         | 89.33% | 90.17% | 11.71% | 88.51% | 89.23% |
| PAAD | SVM         | 95.68% | 96.41% | 5.12%  | 94.96% | 95.64% |

148

149

150

151

152

153

154

155 **SUPPL. TABLE 2**

156 **Available in .xlsx format (Additional file 3)**

157

158

159

160

SUPPL. TABLE 3

161

162

163

164

Comparison of the somatic mutation ratio in the whole dataset vs in the subset of variants that were catalogued by dbSNP/common\_all but not by COSMIC. The latest contains vanishingly small number of somatic mutations. In contrast, significant portion of somatic mutations catalogued.

| Dataset<br>[Source] | Total number of variants in the set,<br>germline / somatic<br>[% of somatic] | Number of variants catalogued by<br>dbSNP/common but not COSMIC,<br>germline/somatic<br>[% of somatic] |
|---------------------|------------------------------------------------------------------------------|--------------------------------------------------------------------------------------------------------|
| UCEC [TCGA]         | 504,241 / 38,012<br>[7.0%]                                                   | 368,834 / 80<br>[0.02%]                                                                                |
| COAD [TCGA]         | 1,932,510 / 60,624<br>[3.04%]                                                | 1,374,557 / 245<br>[0.017%]                                                                            |
| KIRC [TCGA]         | 2,416,155 / 10,489<br>[0.43%]                                                | 1,744,218 / 371<br>[0.02%]                                                                             |
| ESO [dbGAP]         | 790,051 / 26,098<br>[3.19%]                                                  | 550,897 / 66<br>[0.012%]                                                                               |
| PAAD [TCGA]         | 1,263,918 / 5,593<br>[0.44%]                                                 | 879,313 / 87<br>[0.01%]                                                                                |
| BRCA [TCGA]         | 1,037,432 / 5,556<br>[0.53%]                                                 | 751,453 / 77<br>[0.01%]                                                                                |

## Additional File 1 - Supplemental material

ISOWN: accurate somatic mutation identification in the absence of normal tissue controls

### SUPPL. TABLE 4

Number of germline variants with high CNT in different cancer sets.

| Dataset     | Number of<br>germlines with<br>CNT >= 150 | Number of<br>germlines with<br>CNT >= 100 | Number of<br>germlines with<br>CNT >= 50 | Number of<br>germlines with<br>CNT >= 30 |
|-------------|-------------------------------------------|-------------------------------------------|------------------------------------------|------------------------------------------|
| UCEC [TCGA] | 0                                         | 0                                         | 0                                        | 41                                       |
| COAD [TCGA] | 1                                         | 1                                         | 1                                        | 61                                       |
| KIRC [TCGA] | 1                                         | 1                                         | 1                                        | 146                                      |
| ESO [dbGAP] | 2                                         | 2                                         | 3                                        | 46                                       |
| PAAD [TCGA] | 1                                         | 1                                         | 1                                        | 73                                       |
| BRCA [TCGA] | 3                                         | 3                                         | 4                                        | 78                                       |

175

176

SUPPL. TABLE 5

177

178

Number of variants with “mixed” labels in different cancer sets as well as their characteristics. \*Only non-silent SNVs in coding regions.

| Dataset     | Total number of the unique variants in the dataset* | Total number of the unique variants with mixed labels [% of total] | Number of mixed variants with `1:50+` pattern | Number of mixed variants with “1:1” pattern |
|-------------|-----------------------------------------------------|--------------------------------------------------------------------|-----------------------------------------------|---------------------------------------------|
| UCEC [TCGA] | 74,258                                              | 126 [0.17%]                                                        | 34                                            | 35                                          |
| COAD [TCGA] | 160,818                                             | 1,127 [0.70%]                                                      | 263                                           | 363                                         |
| KIRC [TCGA] | 118,119                                             | 662 [0.56%]                                                        | 355                                           | 67                                          |
| ESO [dbGAP] | 81,369                                              | 339 [0.42%]                                                        | 52                                            | 93                                          |
| PAAD [TCGA] | 79,437                                              | 5 [0.006%]                                                         | 2                                             | 0                                           |
| BRCA [TCGA] | 58,061                                              | 195 [0.330%]                                                       | 83                                            | 15                                          |

## Additional File 1 - Supplemental material

ISOWN: accurate somatic mutation identification in the absence of normal tissue controls

### SUPPL. TABLE 6

Distribution of the collapsed (unique) somatic mutations and germline polymorphisms in different categories for functional impacts based on Mutation Assessor (MA) annotations across six cancer datasets. Only variants with known MA annotations were taken into account. Germlines are prone to be more neutral, whereas somatic mutations have more high and medium impacts on the protein functionality. Mutation Assessor serves as an independent feature in ISOWN. The p-value was estimated based on 2-sample test for equality of proportions.

| Cancer | Annotation from Mutation Assessor | Germline, % | Somatic, % | p-value from prop test |
|--------|-----------------------------------|-------------|------------|------------------------|
| KIRC   | High                              | 2.599 %     | 6.036 %    | <1.0E-15               |
| KIRC   | Medium                            | 23.299 %    | 32.134 %   | <1.0E-15               |
| KIRC   | Low                               | 34.182 %    | 34.198 %   | >0.05                  |
| KIRC   | Neutral                           | 39.921 %    | 27.632 %   | <1.0E-15               |
| COAD   | High                              | 2.444 %     | 5.946 %    | <1.0E-15               |
| COAD   | Medium                            | 22.394 %    | 34.239 %   | <1.0E-15               |
| COAD   | Low                               | 33.462 %    | 34.222 %   | 0.018                  |
| COAD   | Neutral                           | 41.700 %    | 25.592 %   | <1.0E-15               |
| UCEC   | High                              | 2.188 %     | 5.466 %    | <1.0E-15               |
| UCEC   | Medium                            | 19.832 %    | 34.335 %   | <1.0E-15               |
| UCEC   | Low                               | 32.633 %    | 35.833 %   | <1.0E-15               |
| UCEC   | Neutral                           | 45.347 %    | 24.366 %   | <1.0E-15               |
| ESO    | High                              | 2.934 %     | 7.145 %    | <1.0E-15               |
| ESO    | Medium                            | 23.343 %    | 35.239 %   | <1.0E-15               |
| ESO    | Low                               | 33.155 %    | 33.740 %   | >0.05                  |
| ESO    | Neutral                           | 40.568 %    | 23.876 %   | <1.0E-15               |
| BRCA   | High                              | 2.594 %     | 6.303 %    | <1.0E-15               |
| BRCA   | Medium                            | 21.404 %    | 33.944 %   | <1.0E-15               |
| BRCA   | Low                               | 33.686 %    | 34.710 %   | 0.640                  |
| BRCA   | Neutral                           | 42.316 %    | 25.043 %   | <1.0E-15               |

14 **Additional File 1 - Supplemental Materials**

ISOWN: accurate somatic mutation identification in the absence of normal tissue controls

|      |         |          |          |          |
|------|---------|----------|----------|----------|
| PAAD | High    | 2.491 %  | 5.293 %  | <1.0E-15 |
| PAAD | Medium  | 22.073 % | 34.478 % | <1.0E-15 |
| PAAD | Low     | 33.163 % | 34.371 % | 0.021    |
| PAAD | Neutral | 42.272 % | 25.858 % | <1.0E-15 |

190

191

192

## Additional File 1 - Supplemental material

ISOWN: accurate somatic mutation identification in the absence of normal tissue controls

### SUPPL. TABLE 7

Distribution of the collapsed (unique) somatic mutations and germline polymorphisms in three categories of PolyPhen-2 across six cancer datasets. Only variants with known annotations were taken into account. Germlines are significantly enriched in 'benign' type, and somatic in both 'probably' and 'possibly damaging'. PolyPhen-2 also serves as an independent feature in ISOWN.

| Cancer | Annotation from PolyPhen-2 | Germline, % | Somatic, % | p-value from prop.test |
|--------|----------------------------|-------------|------------|------------------------|
| KIRC   | Benign                     | 55.672 %    | 38.797 %   | <1.0E-15               |
| KIRC   | Probably damaging          | 28.663 %    | 43.418 %   | <1.0E-15               |
| KIRC   | Possibly damaging          | 15.649 %    | 17.764 %   | 0.001                  |
| COAD   | Benign                     | 57.097 %    | 34.870 %   | <1.0E-15               |
| COAD   | Probably damaging          | 27.133 %    | 48.526 %   | <1.0E-15               |
| COAD   | Possibly damaging          | 15.743 %    | 16.589 %   | 0.0025                 |
| UCEC   | Benign                     | 63.540 %    | 37.531 %   | <1.0E-15               |
| UCEC   | Probably damaging          | 21.614 %    | 43.041 %   | <1.0E-15               |
| UCEC   | Possibly damaging          | 14.824 %    | 19.428 %   | <1.0E-15               |
| ESO    | Benign                     | 55.844 %    | 32.519 %   | <1.0E-15               |
| ESO    | Probably damaging          | 28.601 %    | 50.315 %   | <1.0E-15               |
| ESO    | Possibly damaging          | 15.544 %    | 15.544 %   | 0.000078               |
| BRCA   | Benign                     | 60.111 %    | 38.406 %   | <1.0E-15               |
| BRCA   | Probably damaging          | 23.934 %    | 43.665 %   | <1.0E-15               |
| BRCA   | Possibly damaging          | 15.941 %    | 17.928 %   | 0.01                   |
| PAAD   | Benign                     | 58.301 %    | 36.792 %   | <1.0E-15               |
| PAAD   | Probably damaging          | 26.414 %    | 46.780 %   | <1.0E-15               |
| PAAD   | Possibly damaging          | 15.259 %    | 16.415 %   | 0.01                   |
